# Supplementary material for: Polarization-sensitive stimulated Raman scattering imaging resolves amphotericin B orientation in Candida membrane
Source: PubMed Central journal article supplement — Sci Adv. 2021 Jan 6;7(2):eabd5230. doi: 10.1126/sciadv.abd5230 (PMC7787481; doi:10.1126/sciadv.abd5230), 2021-01-06
Supplement: abd5230_SM.pdf [file abd5230_SM.pdf]

## Supplementary Materials for

### **Polarization-sensitive stimulated Raman scattering imaging resolves amphotericin B orientation in *Candida* membrane**

Pu-Ting Dong, Cheng Zong, Zeina Dagher, Jie Hui, Junjie Li, Yuewei Zhan, Meng Zhang, Michael K. Mansour, Ji-Xin Cheng\*

\*Corresponding author. Email: [jxcheng@bu.edu](mailto:jxcheng@bu.edu)

Published 6 January 2021, *Sci. Adv.* 7, eabd5230 (2021)  
DOI: 10.1126/sciadv.abd5230

#### **This PDF file includes:**

Figs. S1 to S10

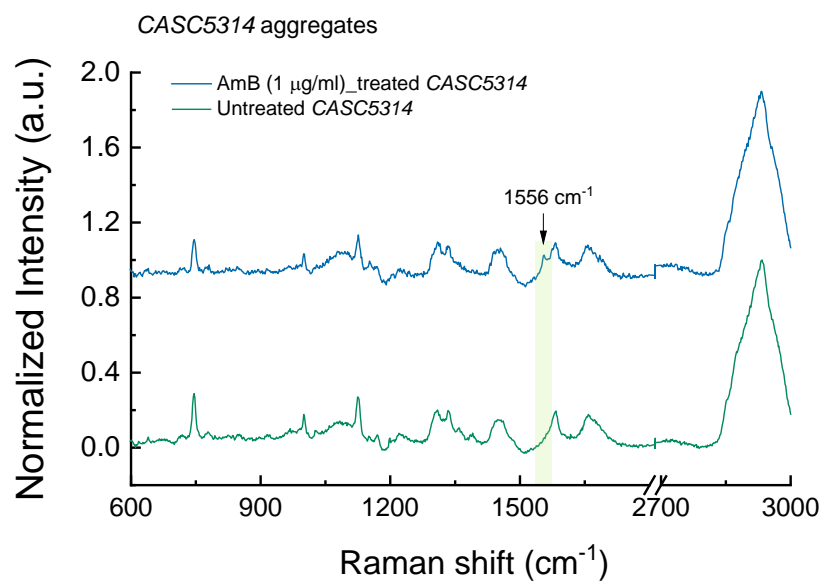

**Supplementary Figure 1. Raman spectra of AmB-treated and untreated log-phase CASC5314 aggregates.** Sample was dried onto the surface of aluminum substrate. AmB: 3.2  $\mu\text{g/ml}$ , 1-h treatment. Excitation: 532 nm. Power: 8 mW. Spectrum acquisition time: 30 s. 1556  $\text{cm}^{-1}$  was highlighted by green box.

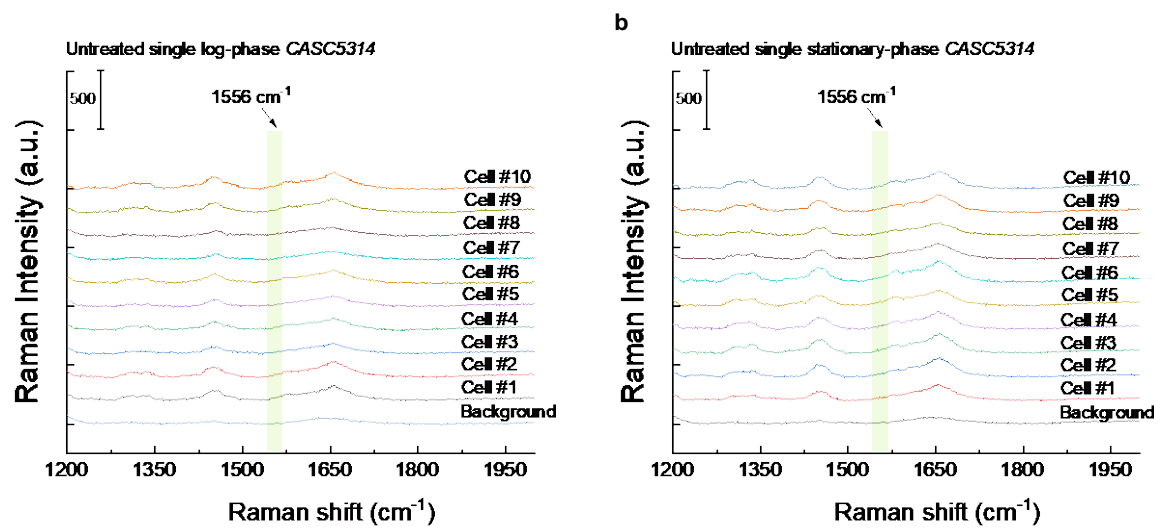

**Supplementary Figure 2. Raman spectra of untreated single log-phase (a) and stationary-phase (b) *CASC5314*.** Samples were sandwiched between a poly-lysine-coated cover slide and a cover glass. Power: 8 mW. Spectrum acquisition time: 30 s. 1556 cm<sup>-1</sup> was indicated by a green box.

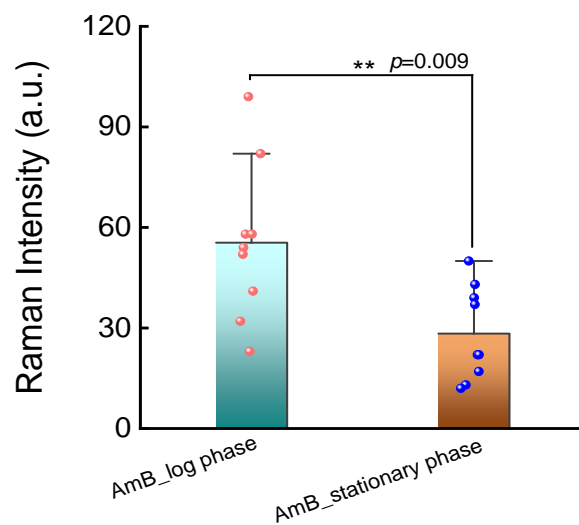

**Supplementary Figure 3. Quantitative analysis of AmB amount (Raman signal at  $1556\text{ cm}^{-1}$ ) from AmB-treated single log-phase and stationary-phase *CASC5314*. Each dot came from a single yeast. Student unpaired *t*-test. \*\*:  $p<0.01$ .**

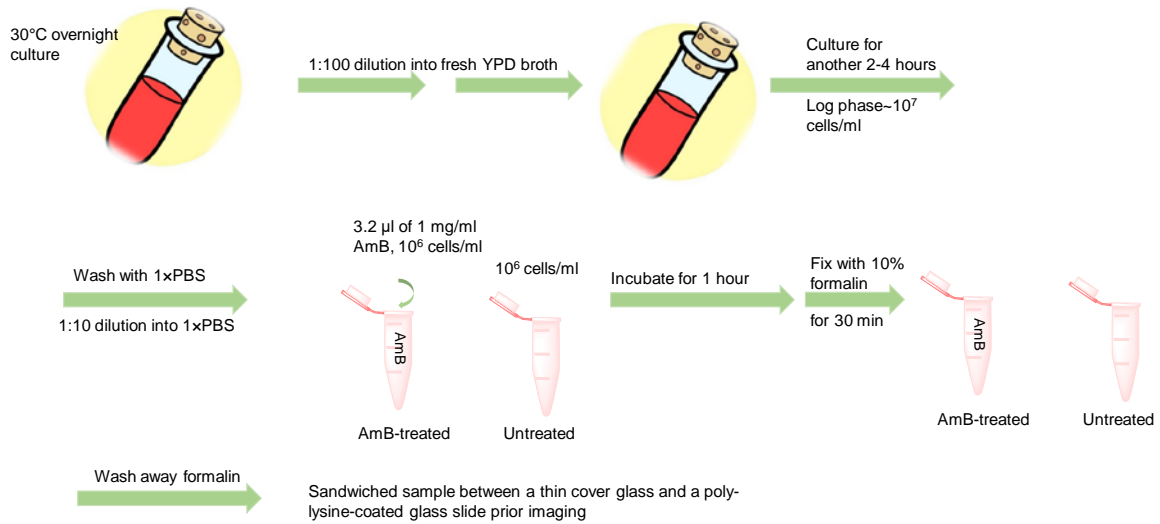

❖ Sample prepared the day before imaging

**Supplementary Figure 4. Schematic illustration of sample preparation procedure of AmB-treated *Candida spp.* and *Candida auris*.**

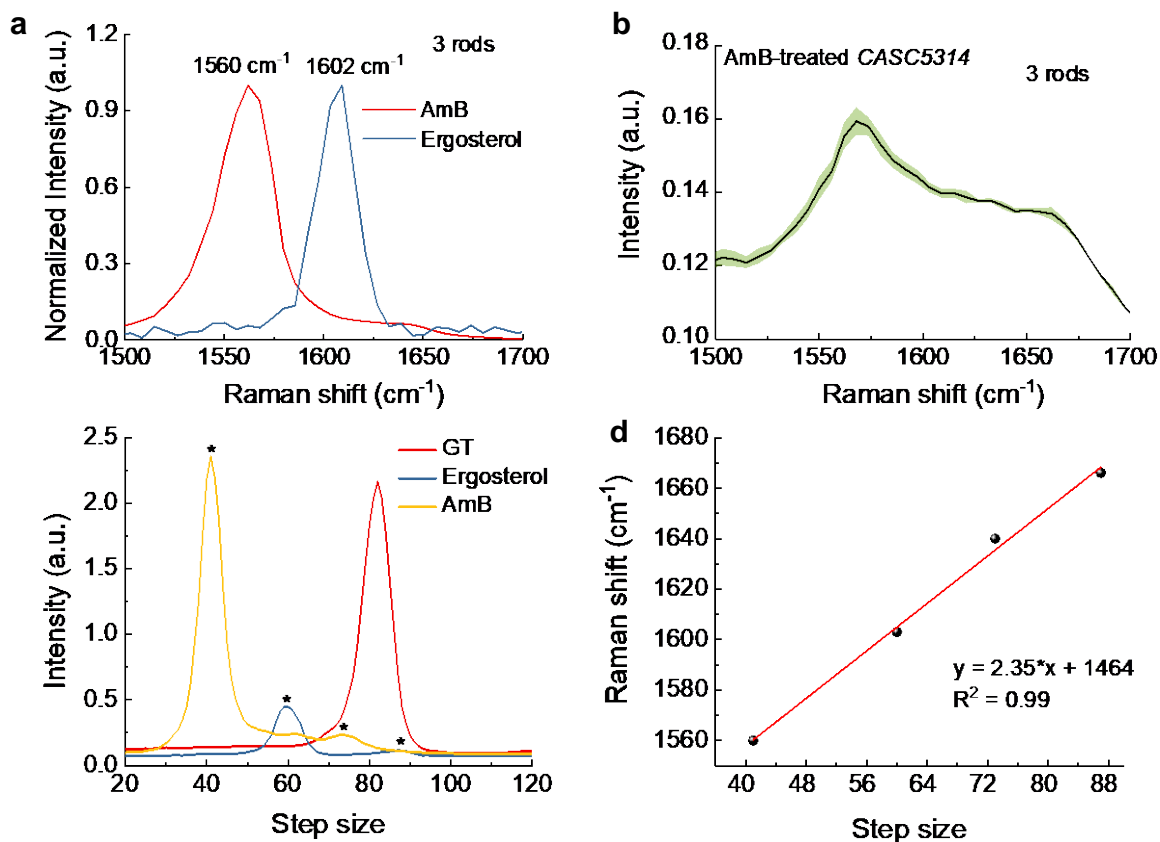

**Supplementary Figure 5. Performance of three-rod chirping hyperspectral SRS microscope and calibration of six-rod chirping hyperspectral SRS system by pure glycerol trioleate (GT), ergosterol crystal and 10 mg/ml AmB.** **a.** SRS spectra of 10 mg/ml AmB in DMSO and pure ergosterol crystal, with marked Raman peaks. Three-rod chirping condition. **b.** SRS spectra of AmB-treated single *CASC5314* cells. Data: Mean $\pm$ SD from at least ten yeasts. Amp: 3.2  $\mu\text{g/ml}$  for 1 hour. Data acquired under three-rod chirping condition. **c.** The step size profiles of pure chemicals in the interested spectral window. **d.** The calibration curve of Raman shifts versus step size in the interested spectral window.

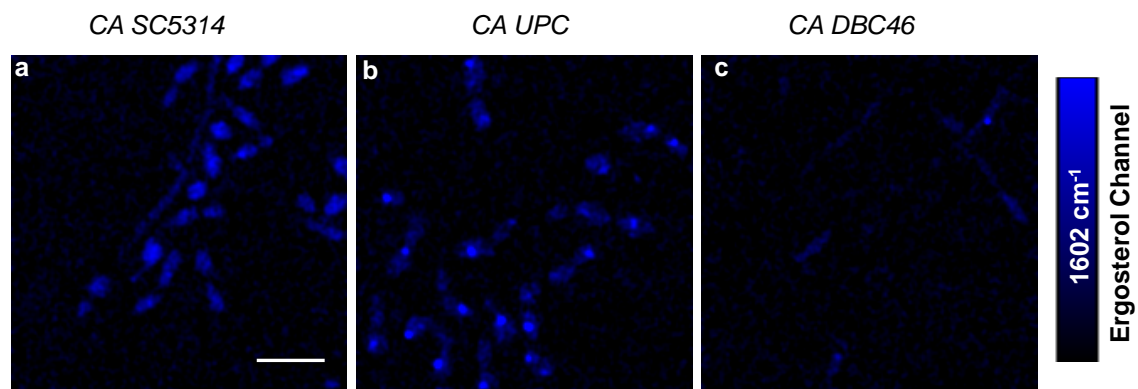

**Supplementary Figure 6. SRS images of ergosterol at 1602 cm<sup>-1</sup> in *CASC5314* (a) and isogenic mutants *CA UPC* and *CA DBC46* (b-c).**

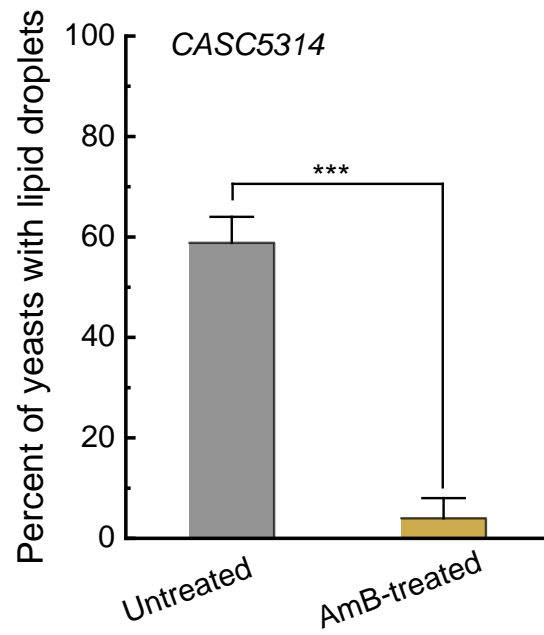

**Supplementary Figure 7. Quantitative analysis of the percent of *CASC5314* yeast cells with lipid droplets by SRS imaging at 1650  $\text{cm}^{-1}$  with and without AmB-treatment.** Data: Mean $\pm$ SD, from at least five different field of views. Student unpaired *t*-test. \*\*\*:  $p < 0.001$ .



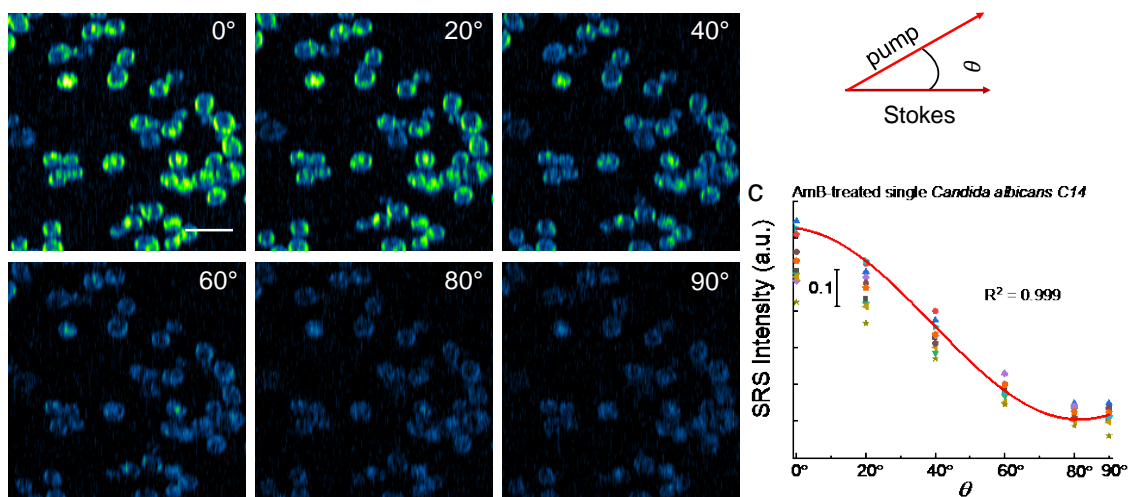

**Supplementary Figure 8. Polarization-sensitive SRS imaging of AmB-treated *Candida albicans* C14 at 1556 cm<sup>-1</sup> when the polarization of pump beam was rotated with respect to that of Stokes beam. a.** SRS images of AmB-treated *Candida albicans* C14 at 1556 cm<sup>-1</sup> when the polarization of pump beam was rotated with respect to that of Stokes beam **(b)**. **c.** SRS intensity of single *Candida albicans* C14 at 1556 cm<sup>-1</sup> under different angles shown in **(b)**. Data was fitted by a cosine function. Pump=895 nm, Stokes=1040 nm. Pixel dwell time: 10  $\mu$ s. Scalar bar=10  $\mu$ m.

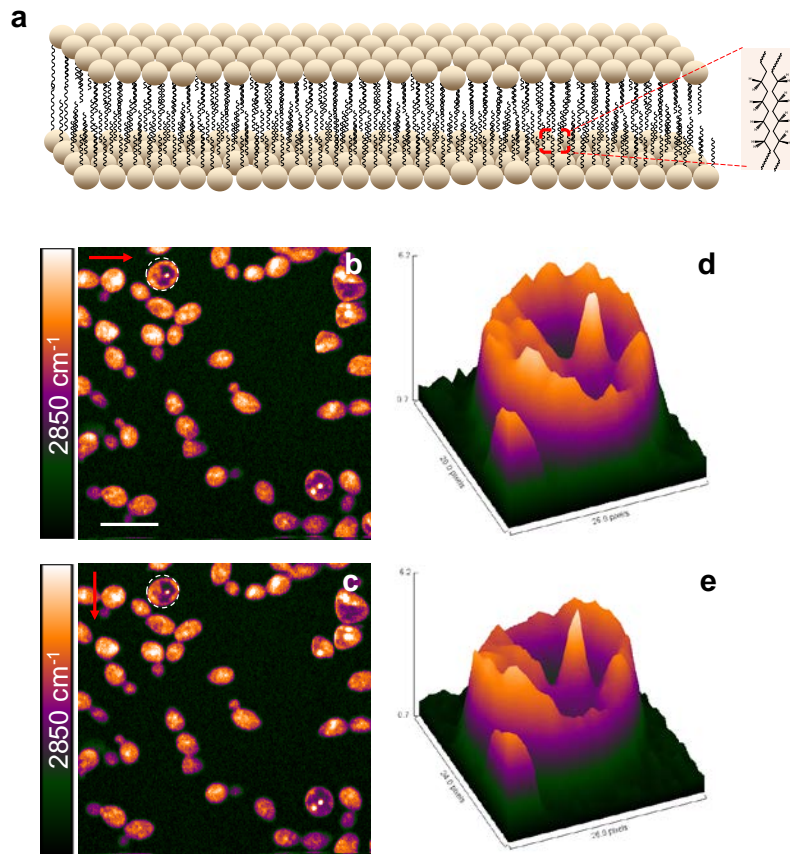

**Supplementary Figure 9. Polarization-sensitive SRS imaging of CH<sub>2</sub> in untreated *CASC5314* at 2850 cm<sup>-1</sup>.** **a.** Schematic of phospholipid bilayer along with its zoom-in view of CH<sub>2</sub> backbone. **b-c.** SRS images of untreated *CASC5314* at 2850 cm<sup>-1</sup> at horizontal and vertical polarization directions, respectively. **d-e.** Zoom-in view of circled (by white dashed line) single yeast from (b-c). Pixel dwell time: 50 μs. Pump=802 nm. Stokes=1040 nm. Scalar bar=10 μm. Laser polarization direction is indicated by red arrow.

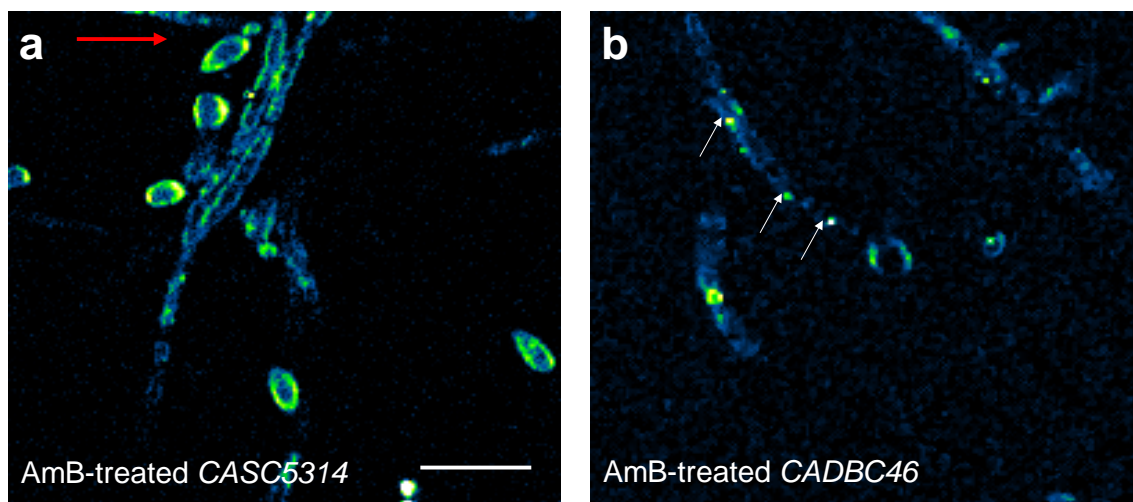

**Supplementary Figure 10. SRS imaging of AmB at  $1556\text{ cm}^{-1}$  in AmB-treated *CASC5314* (a) and *CADBC46* (b).** Amp:  $3.2\text{ }\mu\text{g/ml}$  for 1 hour at  $37^{\circ}\text{C}$ . AmB 'microdomain' was highlighted by white arrow. Pump= $895\text{ nm}$ , Stokes= $1040\text{ nm}$ . Pixel dwell time:  $50\text{ }\mu\text{s}$ . Scalar bar= $10\text{ }\mu\text{m}$ . Laser polarization direction is indicated by red arrow.
